# Supplementary material for: Derivatives and intermediates of betulonic and platanic acid as effective antibacterial agents
Source: Research Square preprint supplement (doi:10.21203/rs.3.rs-8076005/v1), 2025-11-24
Supplement: Supplementary file 1 [file 30fcddd8fc5a1c394871c8c5.docx]

Growth curves of *Staph. aureus* after exposure to betulonic acid (**II**) at concentrations of 250 µM, 125 µM and 62.5 µM and incubation at 35°C for 24 hours. The 1% DMSO sample represents the bacterial growth curve as a negative control. The positive control is the bacterial growth curve inhibited by vancomycin at a concentration of 250 µg·ml⁻¹.

Growth curves of *Staph. aureus* after exposure to derivative **7** at concentrations of 250 µM, 125 µM and 62.5 µM and incubation at 35°C for 24 hours. The 1% DMSO sample represents the bacterial growth curve as a negative control. The positive control is the bacterial growth curve inhibited by vancomycin at a concentration of
250 µg·ml⁻¹.

Growth curves of *Staph. aureus* after exposure to derivative **12** at concentrations of 250 µM, 125 µM and 62.5 µM and incubation at 35°C for 24 hours. The 1% DMSO sample represents the bacterial growth curve as a negative control. The positive control is the bacterial growth curve inhibited by vancomycin at a concentration of
250 µg·ml⁻¹.

Growth curves of *Staph. aureus* after exposure to derivative **1** at concentrations of 250 µM, 125 µM and 62.5 µM and incubation at 35°C for 24 hours. The 1% DMSO sample represents the bacterial growth curve as a negative control. The positive control is the bacterial growth curve inhibited by vancomycin at a concentration of
250 µg·ml⁻¹.
